# Supplementary material for: Transcriptome profiling of litchi leaves in response to low temperature reveals candidate regulatory genes and key metabolic events during floral induction
Source: PubMed Central journal article supplement (PMC5424310; doi:10.1186/s12864-017-3747-x), 2017-05-10
Supplement: 12864_2017_3747_MOESM1_ESM.pdf [file 12864_2017_3747_MOESM1_ESM.pdf]

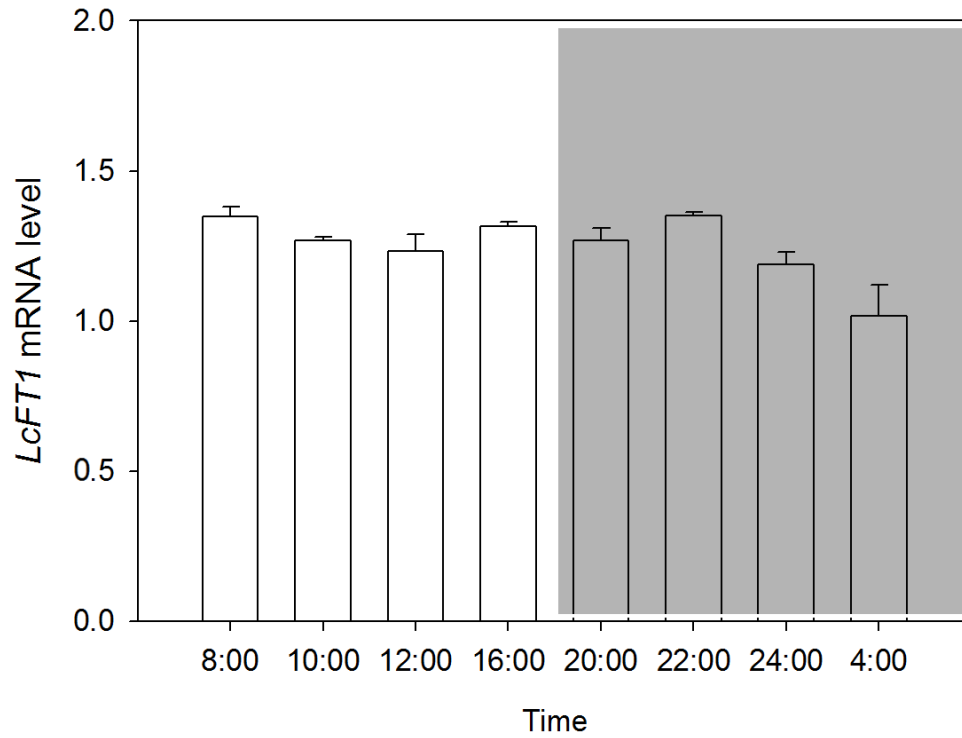

**Additional file 1. The diurnal change of *LcFT1* expression.**

The relative RT-qPCR expression level of *LcFT1* was shown on the y-axis, and the sampled time was indicated on the x-axis. Actin was used as the internal control. The color white represented day, gray stood for night. Bars represent the standard error (n=3).
