# Supplementary material for: Transcriptome profiling of litchi leaves in response to low temperature reveals candidate regulatory genes and key metabolic events during floral induction
Source: PubMed Central journal article supplement (PMC5424310; doi:10.1186/s12864-017-3747-x), 2017-05-10
Supplement: 12864_2017_3747_MOESM3_ESM.pdf [file 12864_2017_3747_MOESM3_ESM.pdf]

### Additional file 3. Primers of candidate and reference genes used for RT-qPCR

| Gene               | Forward primer (5' to 3') | Reverse primer (5' to 3') |
|--------------------|---------------------------|---------------------------|
| <i>LcHK</i>        | TGATAATAGGAACAGGCACT      | TAGGAGAAGCAGGCACAA        |
| <i>LcPFK</i>       | AGTTGTAAAGCAGTATTTCGTG    | AAACCAGGGCAAAGACCA        |
| <i>LcSPS</i>       | CGCTGCTGCTCTTCTATCTG      | TGCTCCTCAATCTCCTGTCTAG    |
| <i>LcSS</i>        | GGTTGGCACAATAGAAGGT       | ATGGCAATGAATGATGTCT       |
| <i>LcSUS</i>       | CCTGGTGGTTCTTACGATTACG    | CTGCTTCCTGGCTTCATCTTC     |
| <i>LcGBSS</i>      | AGCCGTTGCCCAATTTATCAG     | TTGCTCAAGCTGTTTCTCCATC    |
| <i>LcbHLH130-1</i> | GTCAAGACTCTCACGGATACG     | TCAACTCAATAACCGACCTCTC    |
| <i>LcbHLH130-2</i> | ATGAAGCAAGAAGAGGCAGAG     | GCACCAGATTCTCCATTGTTAC    |
| <i>LcGATA</i>      | GCAGCAGAAGCAGCAACC        | TCACTGTCAGCCAACCAATAAG    |
| <i>LcMYB</i>       | GTCAACTCGGTCGCTATCG       | GCAGGCACTAATCTCCCATC      |
| <i>LcTCP</i>       | ACCTACTAACCAGCCTCACA      | TGAAGCCGAGACTGAAGAC       |
| <i>LcbHLH61</i>    | AAGAAGCGAAGCAAGTCA        | CAAATGTCATCCGTCCAA        |
| <i>LcFT</i>        | CAAGACTGAGGGAGTACTTG      | GGAGATCCAAGGTTGTAAAGC     |
| <i>LcFLC</i>       | TCCTCTTCAAAGCGACTCCG      | AGAAAGCCAAGCCACCGTTA      |
| <i>LcFRI</i>       | TCGCCAATCTCAATAAACA       | CTCTTCCCAACAGCGTAAT       |
| <i>LcVIN3</i>      | GTTTGCCAATCACTCCAT        | ACAGTCCTCATCCCGTCT        |
| <i>LcCO</i>        | GCTTCCTGGCTGTTACCGA       | CCATCTGGCACCCTCTAC        |
| <i>LcSOC1</i>      | TCTCGGTTCTTTGTGATGC       | TCTCCTAATAGTCTCCGTTTT     |
| <i>LcAP1</i>       | TTAGGGCAGCCACCTCAGTC      | GTGCAGCAACCTCTTTACATCA    |
| <i>LcVRN1</i>      | TTATCTCCTCCACCATCCA       | CCAACCGTCATAGAACCAG       |
| <i>LcActin</i>     | GTGGTTCTACTATGTTCCCTG     | CTCGTCGTAATCATCCTTTG      |
