# Supplementary material for: Transcriptome profiling of litchi leaves in response to low temperature reveals candidate regulatory genes and key metabolic events during floral induction
Source: PubMed Central journal article supplement (PMC5424310; doi:10.1186/s12864-017-3747-x), 2017-05-10
Supplement: 12864_2017_3747_MOESM4_ESM.pdf [file 12864_2017_3747_MOESM4_ESM.pdf]

**Additional file 4. Summary statistics of the sequence assembly**

| Category                     | Number         |
|------------------------------|----------------|
| Total clean reads            | 103,924,174    |
| Total clean nucleotides (nt) | 10,392,417,400 |
| Q20 percentage               | 99.14%         |
| N percentage                 | 0.00%          |
| GC percentage                | 45.7%          |
| Total number of contigs      | 97,449         |
| Average contig length (bp)   | 941            |
| Total number of unigenes     | 83,107         |
| Average unigene length (bp)  | 1,552          |
