# Supplementary material for: Transcriptome profiling of litchi leaves in response to low temperature reveals candidate regulatory genes and key metabolic events during floral induction
Source: PubMed Central journal article supplement (PMC5424310; doi:10.1186/s12864-017-3747-x), 2017-05-10
Supplement: 12864_2017_3747_MOESM5_ESM.pdf [file 12864_2017_3747_MOESM5_ESM.pdf]

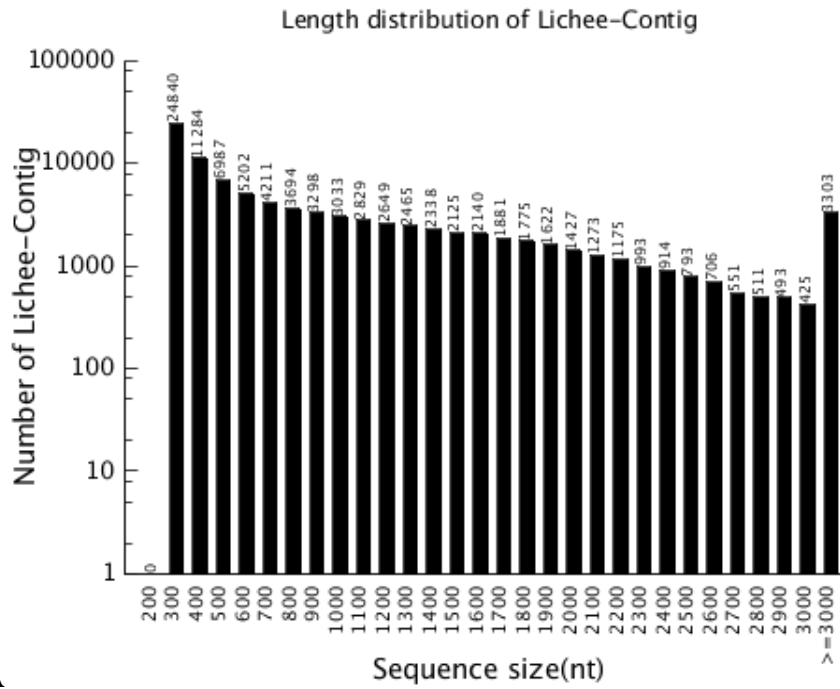

A

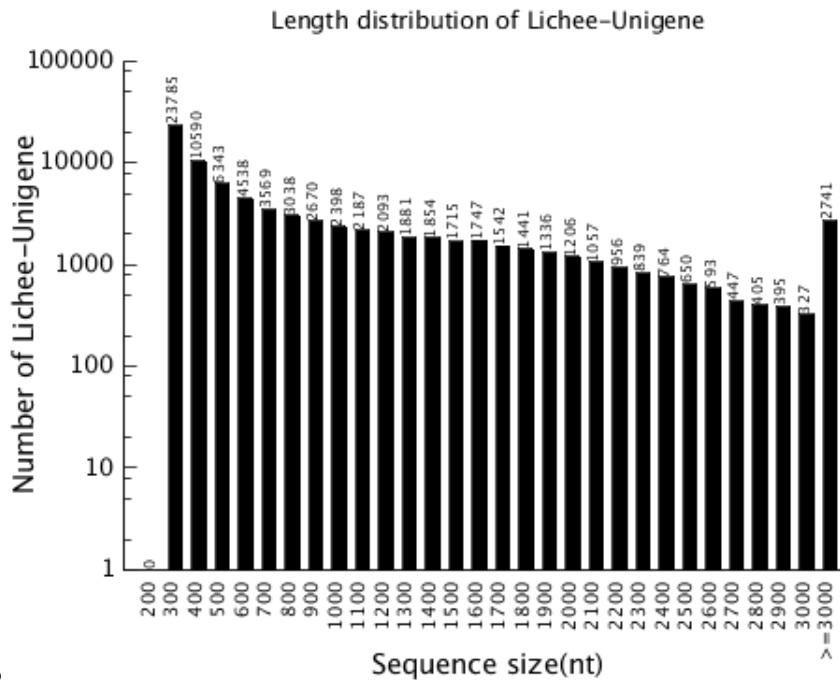

B

**Additional file 5. Length distribution and number of Contigs (A) and Unigenes (B) assembly.**

The horizontal coordinates are lengths and the vertical coordinates are numbers of Contigs and Unigenes.
