# Supplementary material for: Transcriptome profiling of litchi leaves in response to low temperature reveals candidate regulatory genes and key metabolic events during floral induction
Source: PubMed Central journal article supplement (PMC5424310; doi:10.1186/s12864-017-3747-x), 2017-05-10
Supplement: 12864_2017_3747_MOESM6_ESM.pdf [file 12864_2017_3747_MOESM6_ESM.pdf]

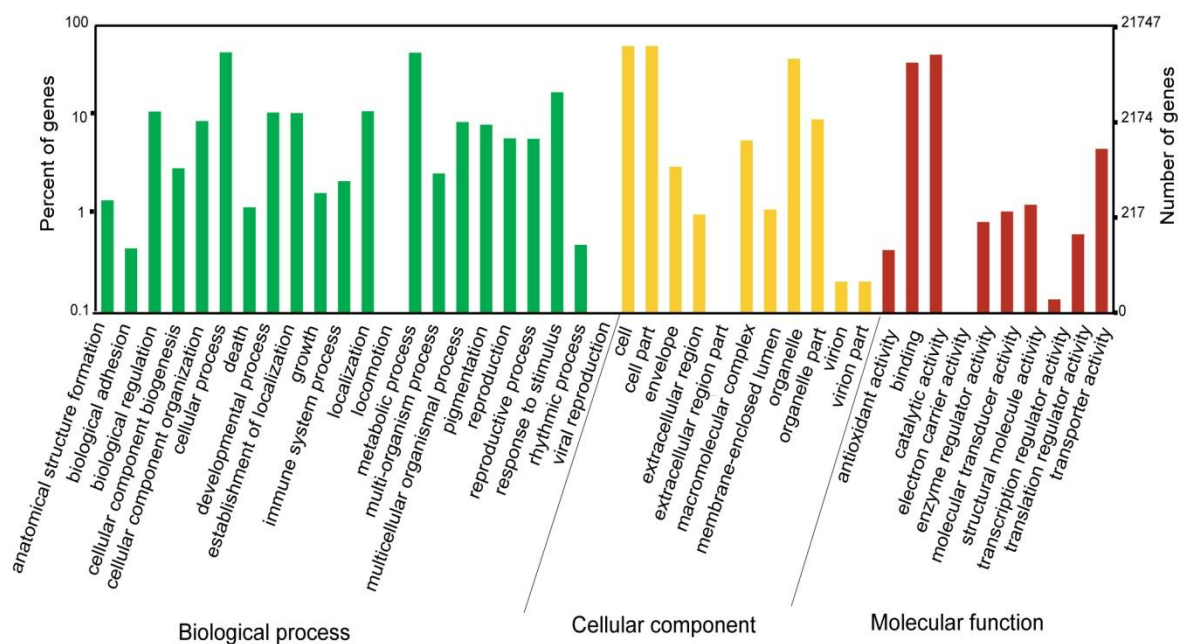

### Additional file 6. Histogram of GO classifications for litchi leaf transcriptome.

The unigenes were assigned to three main categories: biological process, cellular component, and molecular function. The left and right-hand y-axes indicate the percentage and number of annotated unigenes respectively.
