# Supplementary material for: Transcriptome profiling of litchi leaves in response to low temperature reveals candidate regulatory genes and key metabolic events during floral induction
Source: PubMed Central journal article supplement (PMC5424310; doi:10.1186/s12864-017-3747-x), 2017-05-10
Supplement: 12864_2017_3747_MOESM8_ESM.pdf [file 12864_2017_3747_MOESM8_ESM.pdf]

### Additional file 8. Pathway assignment based on KEGG

| No. | Pathway                                     | Number of annotation | of Pathway ID |
|-----|---------------------------------------------|----------------------|---------------|
| 1   | RNA transport                               | 434 (3.25%)          | ko03013       |
| 2   | Ribosome                                    | 348 (2.61%)          | ko03010       |
| 3   | Starch and sucrose metabolism               | 344 (2.58%)          | ko00500       |
| 4   | Purine metabolism                           | 323 (2.42%)          | ko00230       |
| 5   | Plant-pathogen interaction                  | 323 (2.42%)          | ko04626       |
| 6   | Protein processing in endoplasmic reticulum | 309 (2.31%)          | ko04141       |
| 7   | Spliceosome                                 | 303 (2.27%)          | ko03040       |
| 8   | Plant hormone signal transduction           | 303 (2.27%)          | ko04075       |
| 9   | Glycolysis / Gluconeogenesis                | 302 (2.26%)          | ko00010       |
| 10  | Cell cycle                                  | 294 (2.2%)           | ko04110       |
| 11  | Ubiquitin mediated proteolysis              | 289 (2.16%)          | ko04120       |
| 12  | Ribosome biogenesis in eukaryotes           | 279 (2.09%)          | ko03008       |
| 13  | Cell cycle - yeast                          | 268 (2.01%)          | ko04111       |
| 14  | Methane metabolism                          | 242 (1.81%)          | ko00680       |
| 15  | Oxidative phosphorylation                   | 241 (1.8%)           | ko00190       |
| 16  | Pyrimidine metabolism                       | 227 (1.7%)           | ko00240       |
| 17  | Meiosis - yeast                             | 222 (1.66%)          | ko04113       |
| 18  | Oocyte meiosis                              | 222 (1.66%)          | ko04114       |
| 19  | RNA degradation                             | 221 (1.65%)          | ko03018       |
| 20  | mRNA surveillance pathway                   | 210 (1.57%)          | ko03015       |
| 21  | Peroxisome                                  | 208 (1.56%)          | ko04146       |
| 22  | Amino sugar and nucleotide sugar metabolism | 183 (1.37%)          | ko00520       |
| 23  | Valine, leucine and isoleucine degradation  | 182 (1.36%)          | ko00280       |
| 24  | Arginine and proline metabolism             | 177 (1.33%)          | ko00330       |
| 25  | Phenylpropanoid biosynthesis                | 174 (1.3%)           | ko00940       |
| 26  | Lysosome                                    | 172 (1.29%)          | ko04142       |

---

|    |                                             |             |         |
|----|---------------------------------------------|-------------|---------|
| 27 | Fructose and mannose metabolism             | 168 (1.26%) | ko00051 |
| 28 | Galactose metabolism                        | 167 (1.25%) | ko00052 |
| 29 | Cysteine and methionine metabolism          | 164 (1.23%) | ko00270 |
| 30 | Huntington's disease                        | 163 (1.22%) | ko05016 |
| 31 | Pyruvate metabolism                         | 161 (1.21%) | ko00620 |
| 32 | Glycerophospholipid metabolism              | 159 (1.19%) | ko00564 |
| 33 | Inositol phosphate metabolism               | 159 (1.19%) | ko00562 |
| 34 | Endocytosis                                 | 158 (1.18%) | ko04144 |
| 35 | Alzheimer's disease                         | 155 (1.16%) | ko05010 |
| 36 | Phagosome                                   | 151 (1.13%) | ko04145 |
| 37 | Carbon fixation in photosynthetic organisms | 147 (1.1%)  | ko00710 |
| 38 | Aminoacyl-tRNA biosynthesis                 | 147 (1.1%)  | ko00970 |
| 39 | Pentose phosphate pathway                   | 146 (1.09%) | ko00030 |
| 40 | Glutathione metabolism                      | 141 (1.06%) | ko00480 |

---
