# Supplementary material for: Transcriptome profiling of litchi leaves in response to low temperature reveals candidate regulatory genes and key metabolic events during floral induction
Source: PubMed Central journal article supplement (PMC5424310; doi:10.1186/s12864-017-3747-x), 2017-05-10
Supplement: 12864_2017_3747_MOESM10_ESM.pdf [file 12864_2017_3747_MOESM10_ESM.pdf]

profile 1: 887 genes

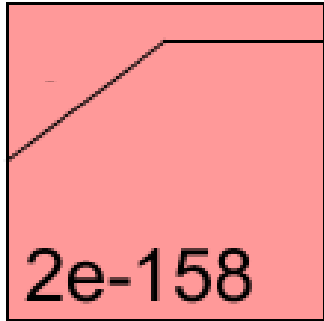

profile 4: 392 genes

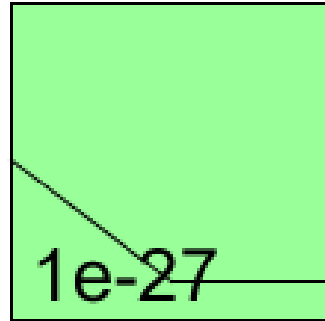

profile 2: 189 genes

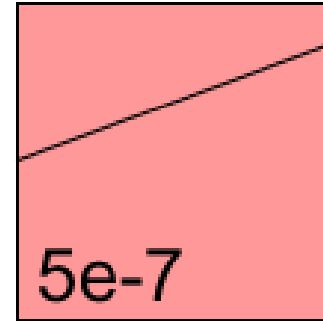

profile 8: 124 genes

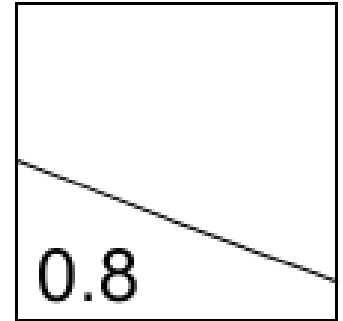

profile 6: 231 genes

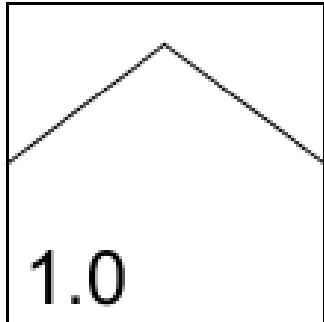

profile 5: 139 genes

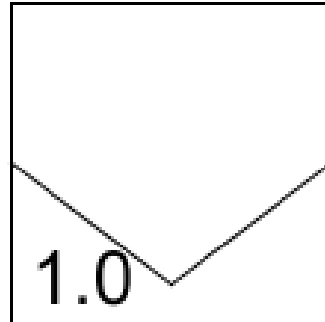

profile 7: 93 genes

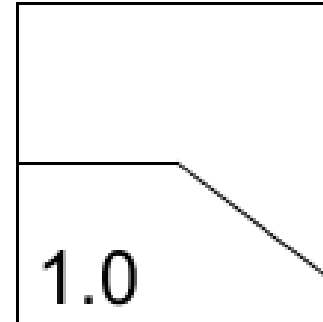

profile 3: 91 genes

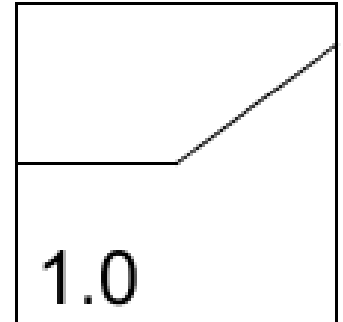

**Additional file 10. All STEM profiles by significance.**

Profiles ordered based on the p-value significance of number of genes assigned versus expected. The ID and gene numbers of profiles were showed on the top of frames. P-values were represented with the number inside. Colored figures denoted the p-value ( $p < 0.05$ ) significance, and the similar trends were setted with the same color.
