# Supplementary material for: Transcriptome profiling of litchi leaves in response to low temperature reveals candidate regulatory genes and key metabolic events during floral induction
Source: PubMed Central journal article supplement (PMC5424310; doi:10.1186/s12864-017-3747-x), 2017-05-10
Supplement: 12864_2017_3747_MOESM11_ESM.pdf [file 12864_2017_3747_MOESM11_ESM.pdf]

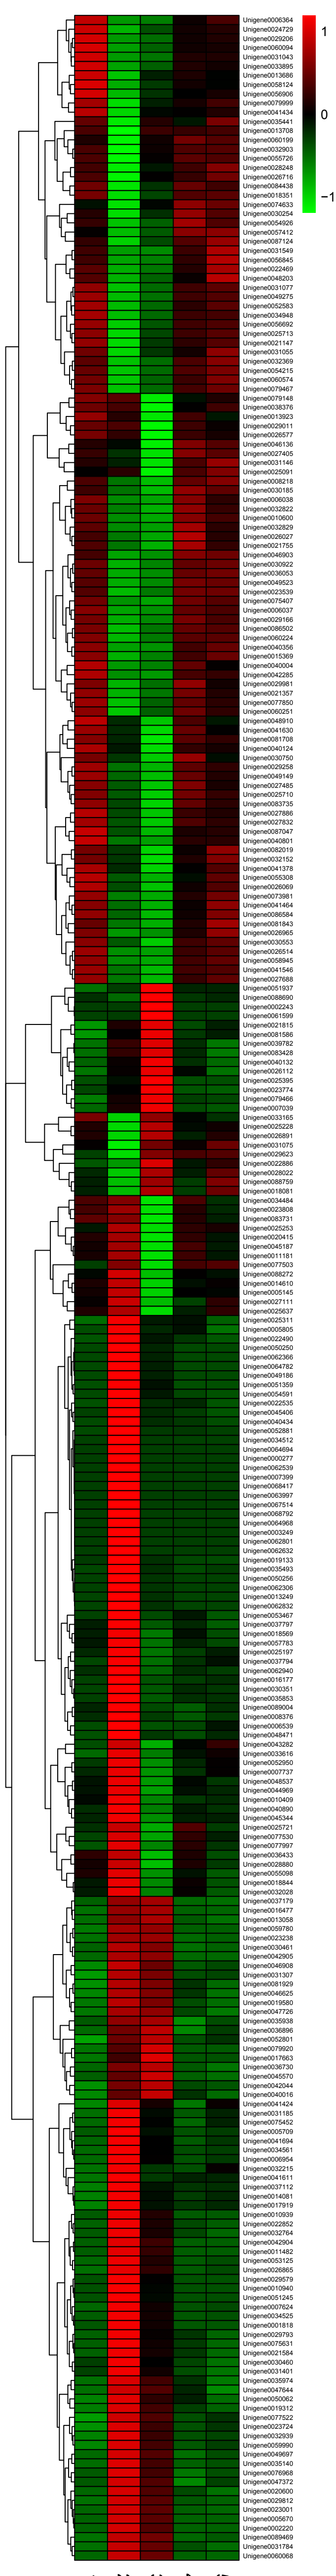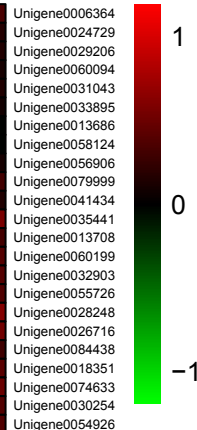

1 2 3 4 5

Unigene0006364  
Unigene0024729  
Unigene0029206  
Unigene0060094  
Unigene0031043  
Unigene0033895  
Unigene0013686  
Unigene0058124  
Unigene0056906  
Unigene0079999  
Unigene0041434  
Unigene0035441  
Unigene0013708  
Unigene0060199  
Unigene0032903  
Unigene0055726  
Unigene0028248  
Unigene0026716  
Unigene0084438  
Unigene0018351  
Unigene0074633  
Unigene0030254  
Unigene0054926  
Unigene0057412  
Unigene0087124  
Unigene0031549  
Unigene0056845  
Unigene0022469  
Unigene0048203  
Unigene0031077  
Unigene0049275  
Unigene0052583  
Unigene0034948  
Unigene0056692  
Unigene0025713  
Unigene0021147  
Unigene0031055  
Unigene0032369  
Unigene0054215  
Unigene0060574  
Unigene0079467  
Unigene0079148  
Unigene0038376  
Unigene0013923  
Unigene0029011  
Unigene0026577  
Unigene0046136  
Unigene0027405  
Unigene0031146  
Unigene0025091  
Unigene0008218  
Unigene0030185  
Unigene0006038  
Unigene0032822  
Unigene0010600  
Unigene0032829  
Unigene0026027  
Unigene0021755  
Unigene0046903  
Unigene0030922  
Unigene0036053  
Unigene0049523  
Unigene0023539  
Unigene0075407  
Unigene0006037  
Unigene0029166  
Unigene0086502  
Unigene0060224  
Unigene0040356  
Unigene0015369  
Unigene0040004  
Unigene0042285  
Unigene0029981  
Unigene0021357  
Unigene0077850  
Unigene0060251  
Unigene0048910  
Unigene0041630  
Unigene0081708  
Unigene0040124  
Unigene0030750  
Unigene0029258  
Unigene0049149  
Unigene0027485  
Unigene0025710  
Unigene0083735  
Unigene0027886  
Unigene0027832  
Unigene0087047  
Unigene0040801  
Unigene0082019  
Unigene0032152  
Unigene0041378  
Unigene0055308  
Unigene0026069  
Unigene0073981  
Unigene0041464  
Unigene0086584  
Unigene0081843  
Unigene0026965  
Unigene0030553  
Unigene0026514  
Unigene0058945  
Unigene0041546  
Unigene0027688  
Unigene0051937  
Unigene0088690  
Unigene0002243  
Unigene0061599  
Unigene0021815  
Unigene0081586  
Unigene0039782  
Unigene0083428  
Unigene0040132  
Unigene0026112  
Unigene0025395  
Unigene0023774  
Unigene0079466  
Unigene0007039  
Unigene0033165  
Unigene0025228  
Unigene0026891  
Unigene0031075  
Unigene0029623  
Unigene0022886  
Unigene0028022  
Unigene0088759  
Unigene0018081  
Unigene0034484  
Unigene0023808  
Unigene0083731  
Unigene0025253  
Unigene0020415  
Unigene0045187  
Unigene0011181  
Unigene0077503  
Unigene0088272  
Unigene0014610  
Unigene0005145  
Unigene0027111  
Unigene0025637  
Unigene0025311  
Unigene0005805  
Unigene0022490  
Unigene0050250  
Unigene0062366  
Unigene0064782  
Unigene0049186  
Unigene0051359  
Unigene0054591  
Unigene0022535  
Unigene0045406  
Unigene0040434  
Unigene0052881  
Unigene0034512  
Unigene0064694  
Unigene0000277  
Unigene0062539  
Unigene0007399  
Unigene0068417  
Unigene0063997  
Unigene0067514  
Unigene0068792  
Unigene0064968  
Unigene0003249  
Unigene0062801  
Unigene0062632  
Unigene0019133  
Unigene0035493  
Unigene0050256  
Unigene0062306  
Unigene0013249  
Unigene0062832  
Unigene0053467  
Unigene0037797  
Unigene0018569  
Unigene0057783  
Unigene0025197  
Unigene0037794  
Unigene0062940  
Unigene0016177  
Unigene0030351  
Unigene0035853  
Unigene0089004  
Unigene0008376  
Unigene0006539  
Unigene0048471  
Unigene0043282  
Unigene0033616  
Unigene0052950  
Unigene0007737  
Unigene0048537  
Unigene0044969  
Unigene0010409  
Unigene0040890  
Unigene0045344  
Unigene0025721  
Unigene0077530  
Unigene0077997  
Unigene0036433  
Unigene0028880  
Unigene0055098  
Unigene0018844  
Unigene0032028  
Unigene0037179  
Unigene0016477  
Unigene0013058  
Unigene0059780  
Unigene0023238  
Unigene0030461  
Unigene0042905  
Unigene0046908  
Unigene0031307  
Unigene0081929  
Unigene0046625  
Unigene0019580  
Unigene0047726  
Unigene0035938  
Unigene0036896  
Unigene0052801  
Unigene0079920  
Unigene0017663  
Unigene0036730  
Unigene0045570  
Unigene0042044  
Unigene0040016  
Unigene0041424  
Unigene0031185  
Unigene0075452  
Unigene0005709  
Unigene0041694  
Unigene0034561  
Unigene0006954  
Unigene0032215  
Unigene0041611  
Unigene0037112  
Unigene0014081  
Unigene0017919  
Unigene0010939  
Unigene0022852  
Unigene0032764  
Unigene0042904  
Unigene0011482  
Unigene0053125  
Unigene0026865  
Unigene0029579  
Unigene0010940  
Unigene0051245  
Unigene0007624  
Unigene0034525  
Unigene0001818  
Unigene0029793  
Unigene0075631  
Unigene0021584  
Unigene0030460  
Unigene0031401  
Unigene0035974  
Unigene0047644  
Unigene0050062  
Unigene0019312  
Unigene0077522  
Unigene0023724  
Unigene0032939  
Unigene0059990  
Unigene0049697  
Unigene0035140  
Unigene0076968  
Unigene0047372  
Unigene0020600  
Unigene0029812  
Unigene0023001  
Unigene0005670  
Unigene0002220  
Unigene0089469  
Unigene0031784  
Unigene0060068

**Additional file 11. Hierarchical clustering analysis and category distribution of DGEs during floral induction.** 276 modulated DEGs were obtained from the gene expression profiles of only significantly differentially expressed under low temperature treatment, but no significant change in control treatment. The  $\log_2$  Ratio for significantly DEGs was used, the up-regulated and down-regulated genes are indicated in red and green respectively. The grids with different ranks from left to right showed 0W, 2W+V, 3W+V, 2W-V and 3W-V.
