# Supplementary material for: Transcriptome profiling of litchi leaves in response to low temperature reveals candidate regulatory genes and key metabolic events during floral induction
Source: PubMed Central journal article supplement (PMC5424310; doi:10.1186/s12864-017-3747-x), 2017-05-10
Supplement: 12864_2017_3747_MOESM13_ESM.pdf [file 12864_2017_3747_MOESM13_ESM.pdf]

**Additional file 13. Putative orthologs of litchi genes involved in flowering induction**

| GeneID                       | 0W<br>(RPKM) | 2W+V<br>(RPKM) | 3W+V<br>(RPKM) | 2W-V<br>(RPKM) | 3W-V<br>(RPKM) | Annotation               |
|------------------------------|--------------|----------------|----------------|----------------|----------------|--------------------------|
| <b>Autonomous pathway</b>    |              |                |                |                |                |                          |
| Unigene0054377               | 8.7          | 10.0           | 9.1            | 9.3            | 8.2            | LUM [Vitis vinifera]     |
| Unigene0054378               | 1.9          | 2.9            | 2.9            | 3.9            | 2.6            | LUM [Glycine max]        |
| Unigene0054379               | 0.3          | 0.7            | 0.5            | 1.5            | 0.7            | LUM [Vitis vinifera]     |
| Unigene0086608               | 44.6         | 43.3           | 43.0           | 42.5           | 50.7           | FCA [Vitis vinifera]     |
| Unigene0025131               | 35.2         | 36.4           | 39.4           | 34.8           | 28.9           | FCA [Vitis vinifera]     |
| Unigene0043090               | 0.6          | 0.4            | 0.3            | 0.1            | 0.2            | FCA [Glycine max]        |
| Unigene0043094               | 0.6          | 2.0            | 1.3            | 0.5            | 0.7            | FCA [Fragaria vesca]     |
| Unigene0043097               | 0.3          | 2.2            | 0.6            | 0.9            | 0.9            | FCA [Fragaria vesca]     |
| Unigene0043096               | 0.1          | 0.2            | 0.3            | 0.2            | 0.1            | FCA [Glycine max]        |
| Unigene0043095               | 0.1          | -              | 0.2            | 0.1            | 0.1            | FCA [Glycine max]        |
| Unigene0025132               | 0.7          | 1.3            | 2.2            | 0.3            | 2.3            | FCA [Vitis vinifera]     |
| Unigene0043093               | -            | 0.2            | 0.1            | -              | 0.1            | FCA [Fragaria vesca]     |
| Unigene0043089               | -            | 0.3            | -              | -              | -              | FCA [Fragaria vesca]     |
| Unigene0061002               | 0.4          | 2.5            | 3.8            | 2.0            | 2.4            | FY [Medicago truncatula] |
| Unigene0060136               | 1.2          | 4.2            | 3.4            | 3.5            | 3.7            | FY [Vitis vinifera]      |
| Unigene0081624               | 10.9         | 9.1            | 10.9           | 8.7            | 12.6           | FPA [Cicer arietinum]    |
| Unigene0088521               | 0.8          | 0.4            | 0.5            | 0.5            | 0.6            | FPA [Glycine max]        |
| Unigene0088522               | 0.7          | 0.6            | 0.8            | 1.1            | 0.7            | FPA [Glycine max]        |
| Unigene0052266               | 2.3          | 7.0            | 6.9            | 5.3            | 5.2            | FPA [Glycine max]        |
| Unigene0040819               | 57.1         | 80.8           | 89.0           | 86.6           | 82.3           | FVE [Litchi chinensis]   |
| <b>Vernalization pathway</b> |              |                |                |                |                |                          |
| Unigene0035533               | 34.7         | 70.7           | 60.8           | 63.0           | 63.6           | VRN1 [Vitis vinifera]    |
| Unigene0037957               | 0.2          | 0.6            | 0.7            | 0.5            | 0.5            | VRN1 [Vitis vinifera]    |
| Unigene0037958               | -            | 0.5            | 0.6            | 1.4            | 0.8            | VRN1 [Vitis vinifera]    |
| Unigene0075163               | 1.1          | 4.7            | 2.5            | 4.2            | 4.4            | VRN1 [Fragaria vesca]    |
| Unigene0086852               | 1.9          | 3.7            | 4.4            | 4.8            | 3.6            | VRN1 [Cucumis sativus]   |
| Unigene0021971               | 5.0          | 25.1           | 22.9           | 18.1           | 18.3           | VRN1 [Cicer arietinum]   |

|                            |       |       |       |       |       |                          |
|----------------------------|-------|-------|-------|-------|-------|--------------------------|
| Unigene0024099             | 0.2   | 1.1   | 1.0   | 2.3   | 1.1   | VRN1 [Cicer arietinum]   |
| Unigene0067329             | -     | 0.7   | 0.4   | 0.4   | 0.6   | VIN3 [Vitis vinifera]    |
| Unigene0089124             | 0.7   | 1.0   | 1.0   | 1.1   | 1.2   | VIN3 [Vitis vinifera]    |
| Unigene0089124             | 0.7   | 1.0   | 1.1   | 1.0   | 1.2   | VIN3 [Vitis vinifera]    |
| Unigene0045531             | 22.0  | 16.9  | 17.8  | 20.9  | 19.0  | VIN3 [Glycine max]       |
| Unigene0034232             | 1.1   | 0.1   | 0.4   | 0.5   | 0.2   | MSI1 [Cucumis sativus]   |
| Unigene0037830             | 53.6  | 46.7  | 43.4  | 45.0  | 39.7  | FLC [Citrus trifoliata]  |
| <b>Photoperiod pathway</b> |       |       |       |       |       |                          |
| Unigene0038504             | 0.1   | 0.2   | 0.4   | 0.3   | 0.4   | TOC1 [Castanea sativa]   |
| Unigene0051713             | 2.7   | 9.8   | 9.2   | 8.5   | 9.7   | PHYE [Theobroma cacao]   |
| Unigene0024396             | 2.7   | 5.4   | 6.7   | 6.4   | 5.5   | PHYE [Theobroma cacao]   |
| Unigene0082114             | 7.1   | 17.1  | 15.8  | 16.7  | 14.4  | PHYC [Theobroma cacao]   |
| Unigene0053719             | 4.0   | 16.0  | 14.1  | 15.4  | 12.6  | PHYB [Theobroma cacao]   |
| Unigene0086802             | 2.0   | 11.3  | 8.5   | 9.9   | 7.9   | PHYA [Theobroma cacao]   |
| Unigene0077682             | 245.2 | 438.9 | 658.5 | 520.3 | 592.9 | GI [Theobroma cacao]     |
| Unigene0046169             | 134.0 | 246.7 | 361.4 | 202.2 | 217.1 | GI [Fragaria vesca]      |
| Unigene0048122             | 10.5  | 103.6 | 104.0 | 86.5  | 81.2  | FKF1 [Glycine max]       |
| Unigene0056472             | 2.3   | 9.6   | 6.9   | 8.4   | 7.4   | ELF7 [Vitis vinifera]    |
| Unigene0057587             | 6.5   | 10.5  | 13.5  | 11.6  | 16.6  | ELF6 [Vitis vinifera]    |
| Unigene0056473             | 4.4   | 5.6   | 5.7   | 6.1   | 5.9   | ELF5 [Vitis vinifera]    |
| Unigene0041580             | 56.4  | 39.5  | 43.0  | 48.6  | 51.4  | ELF5 [Citrus trifoliata] |
| Unigene0041579             | 58.3  | 42.8  | 49.8  | 46.5  | 48.0  | ELF5 [Citrus trifoliata] |
| Unigene0074891             | 8.5   | 14.9  | 15.9  | 15.6  | 22.6  | ELF4 [Vitis vinifera]    |
| Unigene0037820             | 44.0  | 42.8  | 105.7 | 63.6  | 73.0  | ELF4 [Manihot esculenta] |
| Unigene0031962             | 36.2  | 15.5  | 23.2  | 21.6  | 18.9  | ELF4 [Ipomoea nil]       |
| Unigene0053929             | 16.1  | 20.2  | 25.5  | 15.9  | 21.5  | ELF4 [Citrus sinensis]   |
| Unigene0057588             | 30.0  | 42.0  | 51.7  | 47.8  | 65.2  | ELF3 [Vitis vinifera]    |
| Unigene0083829             | 0.2   | 0.7   | 0.8   | 4.7   | 4.8   | CRY [Populus tremula]    |
| Unigene0056595             | 0.2   | 1.4   | 1.5   | 1.0   | 0.7   | CRY [Populus tremula]    |
| Unigene0035119             | 18.4  | 396.2 | 247.3 | 314.5 | 240.4 | CO4 [Theobroma cacao]    |
| Unigene0026093             | 8.3   | 70.2  | 24.6  | 75.5  | 27.5  | CO2 [Theobroma cacao]    |

|                                  |      |       |       |       |       |                          |
|----------------------------------|------|-------|-------|-------|-------|--------------------------|
| Unigene0048016                   | 2.3  | 21.7  | 8.8   | 20.2  | 10.2  | CO2 [Theobroma cacao]    |
| Unigene0048017                   | 0.5  | 4.2   | 0.8   | 2.0   | 1.2   | CO2 [Theobroma cacao]    |
| Unigene0028510                   | 6.3  | 228.1 | 205.1 | 257.5 | 224.6 | CO16 [Vitis vinifera]    |
| Unigene0028510                   | 6.3  | 228.1 | 205.1 | 257.5 | 224.6 | CO16 [Vitis vinifera]    |
| Unigene0022621                   | 0.5  | 29.1  | 18.9  | 17.6  | 14.4  | CO16 [Vitis vinifera]    |
| Unigene0050297                   | 34.4 | 31.6  | 42.4  | 28.3  | 46.3  | CO14 [Vitis vinifera]    |
| Unigene0033519                   | 5.6  | 2.8   | 1.8   | 0.6   | 2.6   | CO14 [Vitis vinifera]    |
| Unigene0075371                   | 20.9 | 19.9  | 23.3  | 22.8  | 26.0  | CO13 [Vitis vinifera]    |
| Unigene0077823                   | 15.5 | 4.2   | 9.3   | 6.1   | 16.6  | CO [Medicago truncatula] |
| Unigene0084415                   | 16.8 | 90.5  | 114.8 | 93.8  | 133.7 | CO [Medicago truncatula] |
| Unigene0039395                   | 14.9 | 289.2 | 164.9 | 224.0 | 105.9 | CO [Litchi chinensis]    |
| <b>Gibberellin pathway</b>       |      |       |       |       |       |                          |
| Unigene0033523                   | 53.9 | 70.3  | 51.0  | 57.1  | 50.6  | GAI [Juglans regia]      |
| Unigene0040525                   | 14.8 | 23.9  | 36.3  | 24.5  | 29.0  | RGA [Gossypium hirsutum] |
| Unigene0010096                   | 0.4  | 2.8   | 0.4   | -     | 0.9   | RGL2 [Vitis vinifera]    |
| Unigene0049693                   | 3.3  | 11.2  | 9.2   | 8.9   | 9.8   | SPY [Malus domestica]    |
| Unigene0049691                   | 1.8  | 6.2   | 3.7   | 6.0   | 3.0   | SPY [Malus domestica]    |
| <b>Floral pathway integrator</b> |      |       |       |       |       |                          |
| Unigene0033852                   | 1.7  | 3.6   | 4.3   | 2.6   | 3.2   | SOC1 [Citrus sinensis]   |
| Unigene0075092                   | 0.8  | 2.3   | 1.1   | 0.9   | 1.6   | SOC1 [Citrus sinensis]   |
| Unigene0025396                   | -    | 0.6   | 11.4  | 0.4   | 1.1   | FT [Litchi chinensis]    |
