# Supplementary material for: Transcriptome profiling of litchi leaves in response to low temperature reveals candidate regulatory genes and key metabolic events during floral induction
Source: PubMed Central journal article supplement (PMC5424310; doi:10.1186/s12864-017-3747-x), 2017-05-10
Supplement: 12864_2017_3747_MOESM16_ESM.pdf [file 12864_2017_3747_MOESM16_ESM.pdf]

**Additional file 16. The analysis of the *LcFT1* promoter elements**

| Site Name       | Organism                    | Position | Strand | Matrix score. | sequence    | function                                                            |
|-----------------|-----------------------------|----------|--------|---------------|-------------|---------------------------------------------------------------------|
| ACE             | <i>Petroselinum crispum</i> | 973      | -      | 9             | CTAACGTATT  | cis-acting element involved in light responsiveness                 |
| ACE             | <i>Petroselinum crispum</i> | 1121     | +      | 9             | AAAACGTTTA  | cis-acting element involved in light responsiveness                 |
| ARE             | <i>Zea mays</i>             | 881      | +      | 6             | TGGTTT      | cis-acting regulatory element essential for the anaerobic induction |
| AT-rich element | <i>Glycine max</i>          | 622      | +      | 10            | ATAGAAATCAA | binding site of AT-rich DNA binding protein (ATBP-1)                |
| Box 4           | <i>Petroselinum crispum</i> | 899      | +      | 6             | ATTAAT      | part of a conserved DNA module involved in light responsiveness     |
| Box 4           | <i>Petroselinum crispum</i> | 915      | +      | 6             | ATTAAT      | part of a conserved DNA module involved in light responsiveness     |
| Box 4           | <i>Petroselinum crispum</i> | 907      | +      | 6             | ATTAAT      | part of a conserved DNA module involved in light responsiveness     |
| Box 4           | <i>Petroselinum crispum</i> | 962      | +      | 6             | ATTAAT      | part of a conserved DNA module involved in light responsiveness     |
| Box 4           | <i>Petroselinum crispum</i> | 903      | +      | 6             | ATTAAT      | part of a conserved DNA module involved in light responsiveness     |
| Box 4           | <i>Petroselinum crispum</i> | 911      | +      | 6             | ATTAAT      | part of a conserved DNA module involved in light responsiveness     |
| Box I           | <i>Pisum sativum</i>        | 1061     | +      | 7             | TTTCAAA     | light responsive element                                            |
| CAAT-box        | <i>Arabidopsis thaliana</i> | 133      | +      | 5             | CCAAT       | common cis-acting element in promoter                               |

|          |                             |     |   |   |       |                                                            |
|----------|-----------------------------|-----|---|---|-------|------------------------------------------------------------|
|          |                             |     |   |   |       | and enhancer regions                                       |
| CAAT-box | <i>Hordeumvulgare</i>       | 134 | + | 4 | CAAT  | common cis-acting element in promoter and enhancer regions |
| CAAT-box | <i>Hordeumvulgare</i>       | 142 | - | 4 | CAAT  | common cis-acting element in promoter and enhancer regions |
| CAAT-box | <i>Hordeumvulgare</i>       | 166 | - | 4 | CAAT  | common cis-acting element in promoter and enhancer regions |
| CAAT-box | <i>Hordeumvulgare</i>       | 225 | + | 4 | CAAT  | common cis-acting element in promoter and enhancer regions |
| CAAT-box | <i>Hordeumvulgare</i>       | 233 | + | 4 | CAAT  | common cis-acting element in promoter and enhancer regions |
| CAAT-box | <i>Brassica rapa</i>        | 255 | - | 5 | CAAAT | common cis-acting element in promoter and enhancer regions |
| CAAT-box | <i>Brassica rapa</i>        | 414 | - | 5 | CAAAT | common cis-acting element in promoter and enhancer regions |
| CAAT-box | <i>Hordeumvulgare</i>       | 423 | + | 4 | CAAT  | common cis-acting element in promoter and enhancer regions |
| CAAT-box | <i>Brassica rapa</i>        | 482 | - | 5 | CAAAT | common cis-acting element in promoter and enhancer regions |
| CAAT-box | <i>Glycine max</i>          | 548 | + | 5 | CAATT | common cis-acting element in promoter and enhancer regions |
| CAAT-box | <i>Arabidopsis thaliana</i> | 557 | + | 5 | CCAAT | common cis-acting element in promoter and enhancer regions |
| CAAT-box | <i>Hordeumvulgare</i>       | 558 | + | 4 | CAAT  | common cis-acting element in promoter and enhancer regions |
| CAAT-box | <i>Brassica rapa</i>        | 630 | + | 5 | CAAAT | common cis-acting element in promoter and enhancer regions |
| CAAT-box | <i>Hordeumvulgare</i>       | 665 | - | 4 | CAAT  | common cis-acting element in promoter and enhancer regions |
| CAAT-box | <i>Brassica rapa</i>        | 686 | - | 5 | CAAAT | common cis-acting                                          |

|          |                             |      |   |   |       |                                                            |
|----------|-----------------------------|------|---|---|-------|------------------------------------------------------------|
|          |                             |      |   |   |       | element in promoter and enhancer regions                   |
| CAAT-box | <i>Arabidopsis thaliana</i> | 720  | - | 5 | CCAAT | common cis-acting element in promoter and enhancer regions |
| CAAT-box | <i>Hordeumvulgare</i>       | 743  | + | 4 | CAAT  | common cis-acting element in promoter and enhancer regions |
| CAAT-box | <i>Brassica rapa</i>        | 750  | + | 5 | CAAAT | common cis-acting element in promoter and enhancer regions |
| CAAT-box | <i>Brassica rapa</i>        | 925  | - | 5 | CAAAT | common cis-acting element in promoter and enhancer regions |
| CAAT-box | <i>Hordeumvulgare</i>       | 940  | + | 4 | CAAT  | common cis-acting element in promoter and enhancer regions |
| CAAT-box | <i>Glycine max</i>          | 952  | - | 5 | CAATT | common cis-acting element in promoter and enhancer regions |
| CAAT-box | <i>Hordeumvulgare</i>       | 953  | - | 4 | CAAT  | common cis-acting element in promoter and enhancer regions |
| CAAT-box | <i>Glycine max</i>          | 1007 | + | 5 | CAATT | common cis-acting element in promoter and enhancer regions |
| CAAT-box | <i>Brassica rapa</i>        | 1030 | - | 5 | CAAAT | common cis-acting element in promoter and enhancer regions |
| CAAT-box | <i>Glycine max</i>          | 1037 | + | 5 | CAATT | common cis-acting element in promoter and enhancer regions |
| CAAT-box | <i>Brassica rapa</i>        | 1064 | + | 5 | CAAAT | common cis-acting element in promoter and enhancer regions |
| CAAT-box | <i>Hordeumvulgare</i>       | 1091 | - | 4 | CAAT  | common cis-acting element in promoter and enhancer regions |
| CAAT-box | <i>Hordeumvulgare</i>       | 1098 | - | 4 | CAAT  | common cis-acting element in promoter and enhancer regions |
| CAAT-box | <i>Arabidopsis thaliana</i> | 1187 | + | 5 | CCAAT | common cis-acting element in promoter and enhancer regions |

|            |                      |      |   |    |              |                                                                |
|------------|----------------------|------|---|----|--------------|----------------------------------------------------------------|
| CAAT-box   | Hordeumvulgare       | 1188 | + | 4  | CAAT         | common cis-acting element in promoter and enhancer regions     |
| CAAT-box   | Glycine max          | 1227 | + | 5  | CAATT        | common cis-acting element in promoter and enhancer regions     |
| CAAT-box   | Brassica rapa        | 1282 | + | 5  | CAAAT        | common cis-acting element in promoter and enhancer regions     |
| CAAT-box   | Hordeumvulgare       | 1407 | + | 4  | CAAT         | common cis-acting element in promoter and enhancer regions     |
| CAAT-box   | Hordeumvulgare       | 1418 | + | 4  | CAAT         | common cis-acting element in promoter and enhancer regions     |
| CAAT-box   | Glycine max          | 1454 | - | 5  | CAATT        | common cis-acting element in promoter and enhancer regions     |
| CAAT-box   | Hordeumvulgare       | 1455 | - | 4  | CAAT         | common cis-acting element in promoter and enhancer regions     |
| CAAT-box   | Hordeumvulgare       | 1478 | - | 4  | CAAT         | common cis-acting element in promoter and enhancer regions     |
| G-Box      | Pisumsativum         | 931  | + | 6  | CACGTT       | cis-acting regulatory element involved in light responsiveness |
| G-box      | Brassica oleracea    | 280  | + | 9  | TAACACGTAG   | cis-acting regulatory element involved in light responsiveness |
| G-box      | Zea mays             | 931  | + | 6  | CACGTT       | cis-acting regulatory element involved in light responsiveness |
| G-box      | Solanumtuberosum     | 460  | + | 7  | CACATGG      | cis-acting regulatory element involved in light responsiveness |
| GAG-motif  | Arabidopsis thaliana | 756  | - | 7  | AGAGAGT      | part of a light responsive element                             |
| GATT-motif | Oryza sativa         | 249  | + | 11 | CTCCTGATTGGA | part of a light responsive element                             |
| GT1-motif  | Arabidopsis thaliana | 553  | - | 6  | GGTTAA       | light responsive element                                       |
| GT1-motif  | Arabidopsis thaliana | 1016 | + | 6  | GGTTAA       | light responsive element                                       |

|                |                      |      |   |    |                      |                                                                 |
|----------------|----------------------|------|---|----|----------------------|-----------------------------------------------------------------|
| HSE            | Brassica oleracea    | 1107 | - | 9  | AGAAAATTCG           | cis-acting element involved in heat stress responsiveness       |
| LTR            | Hordeumvulgare       | 27   | - | 6  | CCGAAA               | cis-acting element involved in low-temperature responsiveness   |
| LTR            | Hordeumvulgare       | 1489 | - | 6  | CCGAAA               | cis-acting element involved in low-temperature responsiveness   |
| MBS            | Arabidopsis thaliana | 69   | - | 6  | CAACTG               | MYB binding site involved in drought-inducibility               |
| MBS            | Arabidopsis thaliana | 1426 | - | 6  | CAACTG               | MYB binding site involved in drought-inducibility               |
| MBS            | Arabidopsis thaliana | 351  | + | 6  | CAACTG               | MYB binding site involved in drought-inducibility               |
| Skn-1_motif    | Oryza sativa         | 289  | + | 5  | GTCAT                | cis-acting regulatory element required for endosperm expression |
| Skn-1_motif    | Oryza sativa         | 476  | + | 5  | GTCAT                | cis-acting regulatory element required for endosperm expression |
| Skn-1_motif    | Oryza sativa         | 404  | - | 5  | GTCAT                | cis-acting regulatory element required for endosperm expression |
| TA-rich region | Nicotianatabacum     | 605  | + | 20 | TATATATATATATATATATA | enhancer                                                        |
| TA-rich region | Nicotianatabacum     | 609  | + | 20 | TATATATATATATATATATA | enhancer                                                        |
| TA-rich region | Nicotianatabacum     | 607  | + | 20 | TATATATATATATATATATA | enhancer                                                        |
| TATA-box       | Arabidopsis thaliana | 47   | + | 4  | TATA                 | core promoter element around -30 of transcription start         |
| TATA-box       | Oryza sativa         | 49   | + | 7  | TACAAAA              | core promoter element around -30 of transcription start         |

|          |                        |     |   |   |           |                                                         |
|----------|------------------------|-----|---|---|-----------|---------------------------------------------------------|
| TATA-box | Lycopersiconesculentum | 97  | + | 5 | TTTTA     | core promoter element around -30 of transcription start |
| TATA-box | Glycine max            | 157 | + | 5 | TAATA     | core promoter element around -30 of transcription start |
| TATA-box | Lycopersiconesculentum | 162 | + | 5 | TTTTA     | core promoter element around -30 of transcription start |
| TATA-box | Lycopersiconesculentum | 176 | - | 5 | TTTTA     | core promoter element around -30 of transcription start |
| TATA-box | Brassica oleracea      | 227 | + | 6 | ATATAA    | core promoter element around -30 of transcription start |
| TATA-box | Arabidopsis thaliana   | 228 | + | 4 | TATA      | core promoter element around -30 of transcription start |
| TATA-box | Arabidopsis thaliana   | 293 | - | 9 | TAAAAATAA | core promoter element around -30 of transcription start |
| TATA-box | Lycopersiconesculentum | 297 | + | 5 | TTTTA     | core promoter element around -30 of transcription start |
| TATA-box | Glycine max            | 300 | + | 5 | TAATA     | core promoter element around -30 of transcription start |
| TATA-box | Arabidopsis thaliana   | 357 | - | 6 | TATAAA    | core promoter element around -30 of transcription start |
| TATA-box | Arabidopsis thaliana   | 358 | - | 5 | TATAA     | core promoter element around -30 of transcription start |
| TATA-box | Arabidopsis thaliana   | 359 | + | 4 | TATA      | core promoter element around -30 of transcription start |
| TATA-box | Arabidopsis thaliana   | 368 | + | 4 | TATA      | core promoter element around -30 of transcription start |
| TATA-box | Arabidopsis thaliana   | 370 | + | 4 | TATA      | core promoter element around -30 of transcription start |
| TATA-box | Lycopersiconesculentum | 551 | + | 5 | TTTTA     | core promoter element around -30                        |

|          |                      |     |   |    |              |                                                         |
|----------|----------------------|-----|---|----|--------------|---------------------------------------------------------|
|          |                      |     |   |    |              | of transcription start                                  |
| TATA-box | Glycine max          | 573 | + | 5  | TAATA        | core promoter element around -30 of transcription start |
| TATA-box | Arabidopsis thaliana | 607 | - | 9  | taTATAAAtc   | core promoter element around -30 of transcription start |
| TATA-box | Brassica napus       | 608 | + | 6  | ATATAT       | core promoter element around -30 of transcription start |
| TATA-box | Arabidopsis thaliana | 609 | + | 8  | TATATATA     | core promoter element around -30 of transcription start |
| TATA-box | Brassica napus       | 610 | + | 6  | ATATAT       | core promoter element around -30 of transcription start |
| TATA-box | Arabidopsis thaliana | 611 | + | 8  | TATATATA     | core promoter element around -30 of transcription start |
| TATA-box | Brassica napus       | 612 | + | 6  | ATATAT       | core promoter element around -30 of transcription start |
| TATA-box | Arabidopsis thaliana | 613 | + | 8  | TATATATA     | core promoter element around -30 of transcription start |
| TATA-box | Brassica napus       | 614 | + | 6  | ATATAT       | core promoter element around -30 of transcription start |
| TATA-box | Arabidopsis thaliana | 615 | + | 8  | TATATATA     | core promoter element around -30 of transcription start |
| TATA-box | Brassica napus       | 616 | + | 6  | ATATAT       | core promoter element around -30 of transcription start |
| TATA-box | Arabidopsis thaliana | 617 | + | 11 | TATAAATATAAA | core promoter element around -30 of transcription start |
| TATA-box | Brassica napus       | 618 | + | 6  | ATATAT       | core promoter element around -30 of transcription start |
| TATA-box | Arabidopsis thaliana | 619 | + | 8  | TATATATA     | core promoter element around -30 of transcription start |
| TATA-box | Brassica napus       | 620 | + | 6  | ATATAT       | core promoter                                           |

|          |                                |     |   |    |            |                                                         |
|----------|--------------------------------|-----|---|----|------------|---------------------------------------------------------|
|          |                                |     |   |    |            | element around -30 of transcription start               |
| TATA-box | <i>Arabidopsis thaliana</i>    | 621 | + | 10 | taTATAAAtc | core promoter element around -30 of transcription start |
| TATA-box | <i>Brassica oleracea</i>       | 622 | + | 6  | ATATAA     | core promoter element around -30 of transcription start |
| TATA-box | Ac                             | 623 | + | 7  | TATAAAT    | core promoter element around -30 of transcription start |
| TATA-box | <i>Lycopersicon esculentum</i> | 638 | + | 5  | TTTTA      | core promoter element around -30 of transcription start |
| TATA-box | <i>Glycine max</i>             | 641 | + | 5  | TAATA      | core promoter element around -30 of transcription start |
| TATA-box | <i>Brassica napus</i>          | 647 | + | 6  | ATTATA     | core promoter element around -30 of transcription start |
| TATA-box | <i>Arabidopsis thaliana</i>    | 648 | - | 5  | TATAA      | core promoter element around -30 of transcription start |
| TATA-box | <i>Arabidopsis thaliana</i>    | 649 | + | 4  | TATA       | core promoter element around -30 of transcription start |
| TATA-box | <i>Pisum sativum</i>           | 677 | - | 7  | TATATGT    | core promoter element around -30 of transcription start |
| TATA-box | <i>Brassica oleracea</i>       | 679 | + | 7  | ATATAAT    | core promoter element around -30 of transcription start |
| TATA-box | <i>Arabidopsis thaliana</i>    | 680 | + | 4  | TATA       | core promoter element around -30 of transcription start |
| TATA-box | <i>Glycine max</i>             | 682 | + | 5  | TAATA      | core promoter element around -30 of transcription start |
| TATA-box | <i>Lycopersicon esculentum</i> | 772 | - | 5  | TTTTA      | core promoter element around -30 of transcription start |
| TATA-box | <i>Glycine max</i>             | 837 | + | 5  | TAATA      | core promoter element around -30 of transcription start |



|          |                                |      |   |   |            |                                                         |
|----------|--------------------------------|------|---|---|------------|---------------------------------------------------------|
| TATA-box | <i>Oryza sativa</i>            | 842  | - | 8 | TATAAGAA   | core promoter element around -30 of transcription start |
| TATA-box | <i>Arabidopsis thaliana</i>    | 845  | - | 7 | TATATAA    | core promoter element around -30 of transcription start |
| TATA-box | <i>Arabidopsis thaliana</i>    | 846  | + | 4 | TATA       | core promoter element around -30 of transcription start |
| TATA-box | <i>Arabidopsis thaliana</i>    | 848  | + | 4 | TATA       | core promoter element around -30 of transcription start |
| TATA-box | <i>Lycopersicon esculentum</i> | 860  | + | 5 | TTTTA      | core promoter element around -30 of transcription start |
| TATA-box | <i>Lycopersicon esculentum</i> | 884  | + | 5 | TTTTA      | core promoter element around -30 of transcription start |
| TATA-box | <i>Brassica napus</i>          | 919  | + | 6 | ATTATA     | core promoter element around -30 of transcription start |
| TATA-box | <i>Arabidopsis thaliana</i>    | 920  | - | 5 | TATAA      | core promoter element around -30 of transcription start |
| TATA-box | <i>Arabidopsis thaliana</i>    | 921  | + | 4 | TATA       | core promoter element around -30 of transcription start |
| TATA-box | <i>Lycopersicon esculentum</i> | 969  | + | 5 | TTTTA      | core promoter element around -30 of transcription start |
| TATA-box | <i>Glycine max</i>             | 972  | + | 5 | TAATA      | core promoter element around -30 of transcription start |
| TATA-box | <i>Daucus carota</i>           | 1008 | - | 9 | ccTATAAATT | core promoter element around -30 of transcription start |
| TATA-box | <i>Lycopersicon esculentum</i> | 1041 | - | 5 | TTTTA      | core promoter element around -30 of transcription start |
| TATA-box | <i>Brassica napus</i>          | 1067 | + | 6 | ATATAT     | core promoter element around -30 of transcription start |
| TATA-box | <i>Arabidopsis thaliana</i>    | 1068 | + | 4 | TATA       | core promoter element around -30                        |

|                 |                        |      |   |   |             |                                                                  |
|-----------------|------------------------|------|---|---|-------------|------------------------------------------------------------------|
|                 |                        |      |   |   |             | of transcription start                                           |
| TATA-box        | Nicotianatabacum       | 1072 | + | 9 | tcTATAAAata | core promoter element around -30 of transcription start          |
| TATA-box        | Arabidopsis thaliana   | 1074 | + | 4 | TATA        | core promoter element around -30 of transcription start          |
| TATA-box        | Lycopersiconesculentum | 1120 | - | 5 | TTTTA       | core promoter element around -30 of transcription start          |
| TATA-box        | Brassica oleracea      | 1196 | + | 6 | ATATAA      | core promoter element around -30 of transcription start          |
| TATA-box        | Arabidopsis thaliana   | 1197 | + | 4 | TATA        | core promoter element around -30 of transcription start          |
| TATA-box        | Lycopersiconesculentum | 1276 | - | 5 | TTTTA       | core promoter element around -30 of transcription start          |
| TATA-box        | Lycopersiconesculentum | 1300 | - | 5 | TTTTA       | core promoter element around -30 of transcription start          |
| TATA-box        | Arabidopsis thaliana   | 1371 | - | 9 | tcTATATAtt  | core promoter element around -30 of transcription start          |
| TATA-box        | Brassica napus         | 1372 | + | 6 | ATATAT      | core promoter element around -30 of transcription start          |
| TATA-box        | Arabidopsis thaliana   | 1373 | + | 8 | TATATATA    | core promoter element around -30 of transcription start          |
| TATA-box        | Brassica napus         | 1374 | + | 6 | ATATAT      | core promoter element around -30 of transcription start          |
| TATA-box        | Arabidopsis thaliana   | 1375 | + | 4 | TATA        | core promoter element around -30 of transcription start          |
| TATA-box        | Arabidopsis thaliana   | 1377 | + | 4 | TATA        | core promoter element around -30 of transcription start          |
| TC-rich repeats | Nicotianatabacum       | 186  | + | 9 | ATTTTCTCCA  | cis-acting element involved in defense and stress responsiveness |

|             |                        |      |   |   |            |                                                              |
|-------------|------------------------|------|---|---|------------|--------------------------------------------------------------|
| TCA-element | Brassica oleracea      | 246  | - | 9 | TCAGAAGAGG | cis-acting element involved in salicylic acid responsiveness |
| TCA-element | Brassica oleracea      | 1434 | - | 9 | GAGAAGAATA | cis-acting element involved in salicylic acid responsiveness |
| TCCC-motif  | Spinaciaoleracea       | 56   | - | 7 | TCTCCCT    | part of a light responsive element                           |
| circadian   | Lycopersiconesculentum | 705  | + | 6 | CAANNNNATC | cis-acting regulatory element involved in circadian control  |
| circadian   | Lycopersiconesculentum | 1064 | + | 9 | CAAAGATATC | cis-acting regulatory element involved in circadian control  |
